# Supplementary material for: Cerium substitution in LaCoO3 perovskite oxide as bifunctional electrocatalysts for hydrogen and oxygen evolution reactions
Source: Royal Society of Chemistry journal article supplement (doi:10.1039/d1nr00069a), 2021-01-01
Supplement: d1nr00069a1.pdf [file d1nr00069a1.pdf]

## Supporting information

For

### Cerium substitution in $\text{LaCoO}_3$ Perovskite as bifunctional electrocatalysts for hydrogen and oxygen evolution reaction

Dingwei Ji<sup>a,1</sup>, Changhai Liu<sup>a,1</sup>, Yanhua Yao<sup>a</sup>, Linlin Luo<sup>a</sup>, Wenchang Wang<sup>b</sup>, Zhidong Chen<sup>b,\*</sup>

<sup>a</sup>*School of Materials Science and Engineering, Jiangsu Collaborative Innovation Center of Photovoltaic Science and Engineering, Changzhou University, Changzhou, 213164, Jiangsu, China.*

<sup>b</sup>*School of Petrochemical Engineering, Changzhou University, Changzhou, 213164, Jiangsu, China*

Table S1. The EDS results of La and Ce in as-prepared catalysts.

| Samples | Atomic ratio |        |
|---------|--------------|--------|
|         | La (%)       | Ce (%) |
| LCC     | 100          | 0      |
| LCC2    | 91.4         | 8.6    |
| LCC4    | 89.2         | 10.8   |
| LCC6    | 88.7         | 11.3   |
| LCC8    | 87.1         | 13.9   |
| LCC10   | 85.3         | 14.7   |

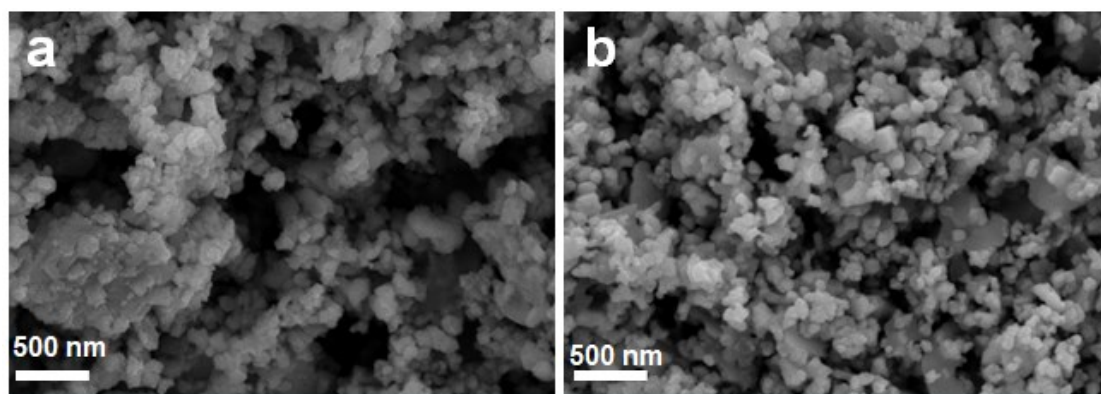

Figure S1 SEM images of pristine LaCoO<sub>3</sub> and LCC4 samples.

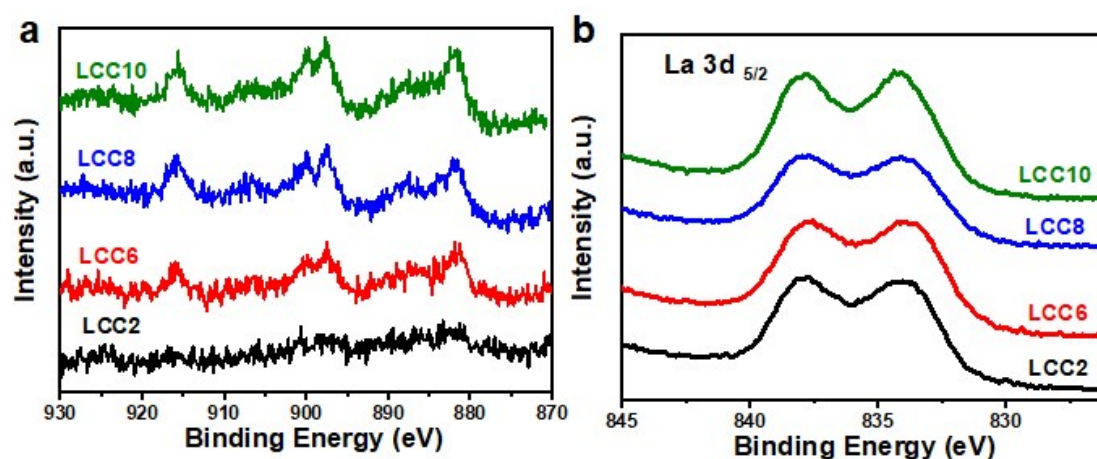

Figure S2 Ce 3d and La 3d<sub>5/2</sub> XPS spectra of LCC2, LCC6, LCC8, and LCC10 samples.

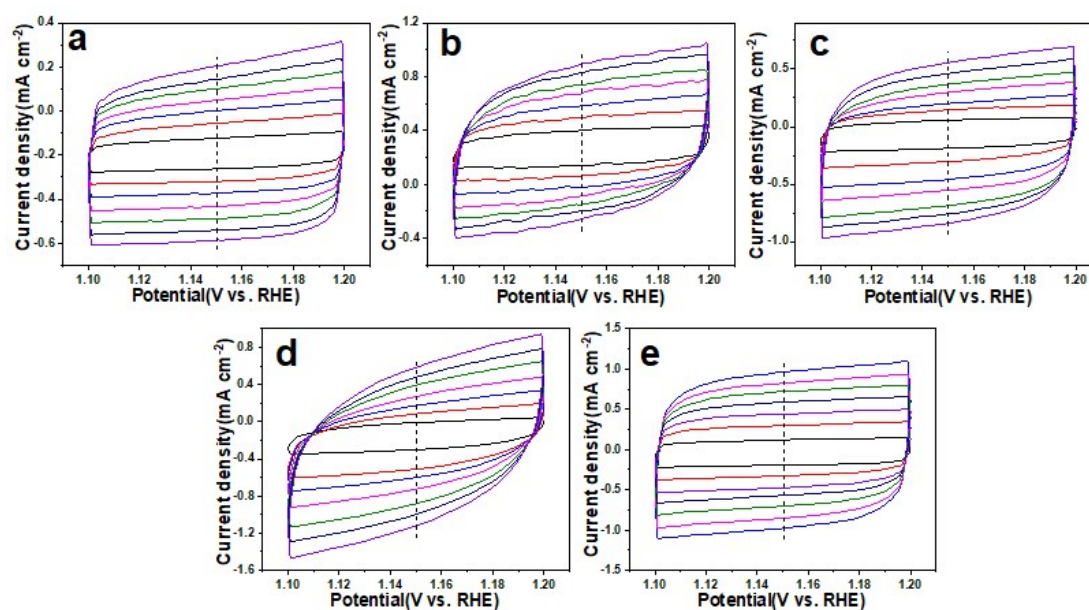

Figure S3 CV curves of (a) LCC, (b) LCC10, (c) LCC8, (d) LCC6, and (e) LCC2 for OER at under different scan rates from 20 to 140 mV s<sup>-1</sup>.

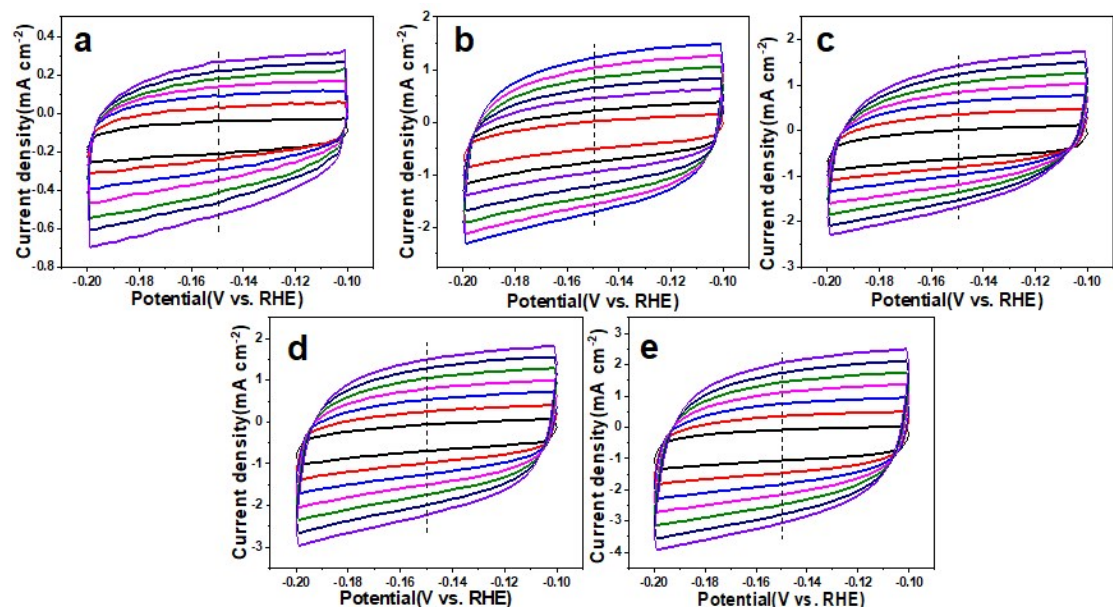

Figure S4 CV curves of (a) LCC, (b) LCC10, (c) LCC8, (d) LCC6, and (e) LCC2 for HER at under different scan rates from 20 to 140  $\text{mV s}^{-1}$ .

Table S2 Comparison of electrocatalytic performance of perovskite oxide  $\text{LaCoO}_3$  for both HER and OER

| Catalysts                                                            | Overpotential (mV) at 10 mA $\text{cm}^{-2}$ | HER/OER Tafel slope (mV/dec) | References       |
|----------------------------------------------------------------------|----------------------------------------------|------------------------------|------------------|
| $\text{La}_x\text{Ce}_{1-x}\text{CoO}_3$                             | 338/410                                      | 144/80                       | <i>This work</i> |
| $\text{LaCo}_x\text{Ni}_{1-x}\text{O}_3$                             | ---/330                                      | ---/59                       | Ref.1            |
| $\text{La}_x\text{Sr}_{1-x}\text{Co}_y\text{Fe}_{1-y}\text{O}_3$     | ---/360                                      | ---/77                       | Ref.2            |
| $\text{La}_x\text{Sr}_{1-x}\text{CoO}_3$                             | ---/340                                      | ---/71                       | Ref.3            |
| $\text{La}_x\text{CoO}_3$                                            | ---/380                                      | ---/83                       | Ref.4            |
| $\text{La}_x\text{Ce}_{1-x}\text{CoO}_3$                             | ---/430                                      | ---/112                      | Ref.5            |
| $\text{LaCo}_x\text{Pt}_{1-x}\text{O}_3$                             | 294/454                                      | 148/86                       | Ref.6            |
| $\text{CaSrFeMnO}_{6-\delta}$                                        | 370/370                                      | 157/75                       | Ref.7            |
| $\text{Ca}_3\text{Co}_4\text{O}_9$                                   | 320/410                                      | 91/61                        | Ref.8            |
| $(\text{Nd}_{0.6}\text{Sr}_{0.4})_3(\text{Co,Fe})_{0.8}$             | 470/420                                      | 133/89                       | Ref.9            |
| $5\text{Nb}_{0.15}\text{O}_7$                                        |                                              |                              |                  |
| $\text{PrBa}_{0.5}\text{Sr}_{0.5}\text{Co}_2\text{O}_5$              | 280/390                                      | 70/53                        | Ref.10           |
| $\text{NdBaMn}_2\text{O}_{5.5}$                                      | 290/430                                      | 87/75                        | Ref.11           |
| $\text{SrNb}_{0.1}\text{Co}_{0.7}\text{Fe}_{0.2}\text{O}_{3-\delta}$ | 260/390                                      | 134/61                       | Ref.12           |

#### References

- H. Wang, J. Qi, N. L. Yang, W. Cui, J. Y. Wang, Q. H. Li, Q. H. Zhang, X. Q. Yu, L. Gu, J. Li, R. B. Yu, K. K. Huang, S. Y. Song, S. H. Feng, D. Wang, Dual-Defects Adjusted Crystal-Field Splitting of  $\text{LaCo}_{(1-x)}\text{Ni}_{(x)}\text{O}_{(3-\delta)}$  Hollow Multishelled Structures for Efficient Oxygen Evolution, *Angew. Chem., Int. Ed.* 59 (2020)

19691-19695.

2. W. Guo, L. Cui, H. W. Xu, C. R. Gong, Selective dissolution of A-site cations of  $\text{La}_{0.6}\text{Sr}_{0.4}\text{Co}_{0.8}\text{Fe}_{0.2}\text{O}_3$  perovskite catalysts to enhance the oxygen evolution reaction, *Appl. Surf. Sci.* 529 (2020) 147165.
3. Y. Lu, A. J. Ma, Y. F. Yu, R. Tan, C. W. Liu, P. Zhang, D. Liu, J. Z. Gui, Engineering Oxygen Vacancies into  $\text{LaCoO}_3$  Perovskite for Efficient Electrocatalytic Oxygen Evolution, *ACS Sustainable Chem. Eng.* 7 (2019) 2906-2910.
4. H. Z. Wang, X. Q. Chen, D. Huang, M. Zhou, D. Ding, H. M. Luo, Cation Deficiency Tuning of  $\text{LaCoO}_3$  Perovskite as Bifunctional Oxygen Electrocatalyst, *ChemCatChem* 12 (2020) 2768-2775.
5. J. M. Qian, T. T. Wang, Z. M. Zhang, Y. G. Liu, J. F. Li, D. Q. Gao, Engineered spin state in Ce doped  $\text{LaCoO}_3$  with enhanced electrocatalytic activity for rechargeable Zn-Air batteries, *Nano Energy* 74 (2020) 104948.
6. C. Y. Wang, L. R. Zeng, W. Guo, C. R. Gong, J. Yang, Enhancing oxygen and hydrogen evolution activities of perovskite oxide  $\text{LaCoO}_3$  via effective doping of platinum, *RSC Adv.* 9 (2019) 35646-35654.
7. R. K. Hona, S. B. Karki, F. Ramezanipour, Oxide Electrocatalysts Based on Earth-Abundant Metals for Both Hydrogen- and Oxygen-Evolution Reactions, *ACS Sustainable Chem. Eng.* 8 (2020) 11549-11557.
8. K. S. Roy, C. Subramaniam, L. S. Panchakarla, Non-Stoichiometry Induced Exsolution of Metal Oxide Nanoparticles via Formation of Wavy Surfaces and their Enhanced Electrocatalytic Activity: Case of Misfit Calcium Cobalt Oxide, *ACS Appl. Mater. Interfaces* 13 (2021) 9897-9907.
9. Y. F. Bu, S. Kim, O. Kwon, Q. Zhong, G. Kim, A Composite Catalyst Based on Perovskites for Overall Water Splitting in Alkaline Conditions, *ChemElectroChem* 6 (2019) 1520-1524.
10. Z. H. Zhang, B. B. He, L. J. Chen, H. W. Wang, R. Wang, L. Zhao, Y. S. Gong, Boosting Overall Water Splitting via  $\text{FeOOH}$  Nanoflake-Decorated  $\text{PrBa}_{0.5}\text{Sr}_{0.5}\text{Co}_2\text{O}_{5+\delta}$  Nanorods, *ACS Appl. Mater. Interfaces* 10 (2018) 38032-38041.
11. J. Wang, Y. Gao, D. J. Chen, J. P. Liu, Z. B. Zhang, Z. P. Shao, F. Ciucci, Water Splitting with an Enhanced Bifunctional Double Perovskite, *ACS Catal.* 8 (2018) 364-371.
12. Y. L. Zhu, W. Zhou, Y. J. Zhong, Y. F. Bu, X. Y. Chen, Q. Zhong, M. L. Liu, Z. P. Shao, A Perovskite Nanorod as Bifunctional Electrocatalyst for Overall Water Splitting, *Adv. Energy Mater.* 7 (2017) 1602122.
